# Supplementary material for: Real-World Data Analysis of Second-Line Antiangiogenic Targeted Treatments Following Anti-Epidermal Growth Factor Receptor Monoclonal Antibodies and First-Line FOLFOX for Patients with Metastatic Colorectal Cancer
Source: PubMed Central journal article supplement — Adv Ther. 2022 Apr 6;39(6):2596–613. doi: 10.1007/s12325-022-02122-4 (PMC9122877; doi:10.1007/s12325-022-02122-4), 2022-04-06

## **SUPPLEMENTARY MATERIAL**

Real-World Data Analysis of Second-Line Antiangiogenic Targeted Treatments Following Anti-Epidermal Growth Factor Receptor Monoclonal Antibodies and First-Line FOLFOX for Patients with Metastatic Colorectal Cancer

Hironaga Satake<sup>1</sup>, Yoshinori Kagawa<sup>2</sup>, Eiji Shinozaki<sup>3</sup>, Yoshinori Tanizawa<sup>4,\*</sup>, Long Jin<sup>4</sup>, Zhihong Cai<sup>4</sup>, Akitaka Makiyama<sup>5</sup>

<sup>1</sup> Department of Medical Oncology, Kochi Medical School, Kochi, Japan; <sup>2</sup> Department of Gastroenterological Surgery, Osaka General Medical Center, Osaka, Japan; <sup>3</sup> Gastroenterology Center, Japanese Foundation for Cancer Research, Cancer Institute Hospital, Tokyo, Japan; <sup>4</sup> Japan Drug Development and Medical Affairs, Eli Lilly Japan K.K., Kobe, Japan; <sup>5</sup> Cancer Center, Gifu University Hospital, Gifu, Japan

### **\*AUTHOR FOR CORRESPONDENCE**

Yoshinori TANIZAWA

Japan Drug Development and Medical Affairs, Eli Lilly Japan K.K.

Tel: +81-80-9305-2141

Email: tanizawa\_yoshinori@lilly.com

**Table S1** Antitumor drugs recommended by the 2019 JSCCR guidelines for advanced CRC

| Nonbiological                                                                                                                                                                                                                                                  |                                                                 | Biological                                                                                                         |                                                                                      |                                                                   |
|----------------------------------------------------------------------------------------------------------------------------------------------------------------------------------------------------------------------------------------------------------------|-----------------------------------------------------------------|--------------------------------------------------------------------------------------------------------------------|--------------------------------------------------------------------------------------|-------------------------------------------------------------------|
| Cytotoxic agents                                                                                                                                                                                                                                               | Other targeted treatment                                        | Antiangiogenic drugs                                                                                               | Anti-EGFR monoclonal antibodies                                                      | Other targeted treatments                                         |
| <ul style="list-style-type: none"> <li>• Fluoropyrimidines (capecitabine, 5-FU, S-1, UFT)</li> <li>• FTD/TPI monotherapy<sup>a</sup></li> <li>• Irinotecan</li> <li>• Oxaliplatin</li> </ul>                                                                   | <ul style="list-style-type: none"> <li>• Regorafenib</li> </ul> | <ul style="list-style-type: none"> <li>• Aflibercept beta</li> <li>• Bevacizumab</li> <li>• Ramucirumab</li> </ul> | <ul style="list-style-type: none"> <li>• Cetuximab</li> <li>• Panitumumab</li> </ul> | <ul style="list-style-type: none"> <li>• Pembrolizumab</li> </ul> |
| <b>Second-line irinotecan-based regimens including antiangiogenic drugs</b>                                                                                                                                                                                    |                                                                 |                                                                                                                    |                                                                                      |                                                                   |
| <ul style="list-style-type: none"> <li>• FOLFIRI + bevacizumab</li> <li>• Irinotecan + S-1 + bevacizumab</li> <li>• Irinotecan + bevacizumab</li> <li>• CAPIRI + bevacizumab</li> <li>• FOLFIRI + ramucirumab</li> <li>• FOLFIRI + aflibercept beta</li> </ul> |                                                                 |                                                                                                                    |                                                                                      |                                                                   |

5-FU fluorouracil, *CAPIRI* capecitabine + irinotecan, *CRC* colorectal cancer, *EGFR* epidermal growth factor receptor, *FOLFIRI* fluorouracil + irinotecan + leucovorin, *FTD/TPI* trifluridine/tipiracil, *JSCCR* Japanese Society for Cancer of the Colon and Rectum, *S-1* tegafur + gimestat + potassium otastat, *UFT* uracil + tegafur

<sup>a</sup>At the time the study was conducted

**Table S2** Concomitant procedures and medications prescribed at baseline (before 1L therapy) and during 1L, 2L, and 3L therapy

| <b>Concomitant procedures and medications, <i>n</i> (%)</b> | <b>Baseline<sup>a</sup><br/>(<i>N</i> = 1163)</b> | <b>1L<br/>(<i>N</i> = 1163)</b> | <b>2L<br/>(<i>N</i> = 1163)</b> | <b>3L<br/>(<i>n</i> = 645)</b> |
|-------------------------------------------------------------|---------------------------------------------------|---------------------------------|---------------------------------|--------------------------------|
| Proteinuria tests                                           | 650 (55.9)                                        | 546 (46.9)                      | 876 (75.3)                      | 381 (59.1)                     |
| NSAIDs                                                      | 579 (49.8)                                        | 503 (43.3)                      | 446 (38.3)                      | 233 (36.1)                     |
| Antihypertensives                                           | 397 (34.1)                                        | 463 (39.8)                      | 570 (49.0)                      | 335 (51.9)                     |
| Topical steroids                                            | 190 (16.3)                                        | 1088 (93.6)                     | 530 (45.6)                      | 229 (35.5)                     |
| Minocycline                                                 | 95 (8.2)                                          | 922 (79.3)                      | 198 (17.0)                      | 91 (14.1)                      |
| Magnesium sulfate injection                                 | 10 (0.9)                                          | 310 (26.7)                      | 53 (4.6)                        | 38 (5.9)                       |

1L/2L/3L first-line/second-line/third-line, NSAID nonsteroidal anti-inflammatory drug

<sup>a</sup>Assessed within 60 days before the index date

**Table S3** Subgroup Cox regression analysis of the factors associated with treatment duration from the start of 2L irinotecan-based chemotherapy plus any antiangiogenic drug in patients for whom total ADL and BMI were available ( $n = 528$ )

| <b>Covariate</b>                                                 | <b>HR</b> | <b>95% CI</b> | <b>p-value</b> |
|------------------------------------------------------------------|-----------|---------------|----------------|
| Demographics and disease characteristics                         |           |               |                |
| ≥70 years at start of 2L therapy <sup>a</sup>                    | 1.03      | 0.81, 1.31    | 0.78           |
| Sex: male                                                        | 1.01      | 0.79, 1.30    | 0.93           |
| Left-sided CRC                                                   | 0.81      | 0.61, 1.08    | 0.15           |
| Metastases/comorbidities before starting 2L therapy <sup>b</sup> |           |               |                |
| Liver metastases                                                 | 0.98      | 0.78, 1.23    | 0.86           |
| Lung metastases                                                  | 0.94      | 0.72, 1.22    | 0.64           |
| Diabetes                                                         | 1.11      | 0.86, 1.44    | 0.41           |
| Renal disease                                                    | 1.10      | 0.76, 1.59    | 0.60           |
| Liver disease                                                    | 1.11      | 0.86, 1.43    | 0.43           |
| Supportive medications before starting 2L therapy <sup>b</sup>   |           |               |                |
| NSAIDs <sup>a</sup>                                              | 1.25      | 0.99, 1.57    | 0.06           |
| Antihypertensives <sup>a</sup>                                   | 1.20      | 0.95, 1.53    | 0.13           |
| Prior antitumor therapies                                        |           |               |                |
| CRC surgery before index date                                    | 0.56      | 0.44, 0.72    | <0.0001        |
| CRC conversion surgery during 1L therapy                         | 0.73      | 0.49, 1.09    | 0.13           |
| Liver surgery during 1L therapy                                  | 0.65      | 0.35, 1.17    | 0.15           |
| Duration of 1L therapy ≥6 months <sup>a</sup>                    | 0.67      | 0.53, 0.83    | <0.001         |
| Additional clinical factors                                      |           |               |                |
| Total ADL independence                                           | 0.54      | 0.38, 0.76    | <0.001         |
| BMI ≤18.5 kg/m <sup>2</sup>                                      | 1.17      | 0.87, 1.58    | 0.31           |

1L/2L first-line/second-line, ADL activities of daily living, BMI body mass index, CI confidence interval, CRC colorectal cancer, HR hazard ratio, NSAID nonsteroidal anti-inflammatory drug

<sup>a</sup>Within 60 days before starting 2L therapy, 37.9% (200/528) of patients were ≥70 years of age, 33.5% (177/528) of patients were prescribed NSAIDs, 33.9% (179/528) were prescribed antihypertensives, and 60.6% (320/528) had duration of 1L therapy ≥6 months

<sup>b</sup>Within 60 days before starting second-line therapy

**Table S4** Five most common antiangiogenic and anti-EGFR antibody treatment regimens as 3L therapy

| Patients, <i>N</i> | 3L antiangiogenic drug prescription (not FTD/TPI+BEV) |              | Patients, <i>N</i> | 3L anti-EGFR antibody prescription |              |
|--------------------|-------------------------------------------------------|--------------|--------------------|------------------------------------|--------------|
|                    | Treatment                                             | <i>n</i> (%) |                    | Treatment                          | <i>n</i> (%) |
| 143                | FOLFIRI, RAM                                          | 53 (37.1)    | 115                | FOLFIRI, PANI                      | 26 (22.6)    |
|                    | FOLFIRI, AFL                                          | 19 (13.3)    |                    | IRI, CET                           | 15 (13.0)    |
|                    | IRIS, BEV                                             | 18 (12.6)    |                    | FOLFOX, PANI                       | 14 (12.2)    |
|                    | FOLFIRI, BEV                                          | 17 (11.9)    |                    | FOLFIRI, CET                       | 13 (11.3)    |
|                    | CAPOX, BEV                                            | 7 (4.9)      |                    | IRI, PANI                          | 12 (10.4)    |

3L third-line, *AFL* aflibercept beta, *BEV* bevacizumab, *CAPOX* capecitabine + oxaliplatin, *CET* cetuximab, *EGFR* epidermal growth factor receptor, *FOLFIRI* leucovorin + 5-fluorouracil + irinotecan, *FOLFOX* leucovorin + 5-fluorouracil + oxaliplatin, *FTD/TPI* trifluridine/tipiracil, *IRIS* S-1 (tegafur + gimeracil + oteracil potassium) + irinotecan, *PANI* panitumumab, *RAM* ramucirumab

**Table S5** Demographics and clinical characteristics of patients with CRC who started 3L therapy

| Variable                                                      | 3L therapy<br>(n = 645) | 3L treatment regimens              |                               |                         |                          |                         |                         |
|---------------------------------------------------------------|-------------------------|------------------------------------|-------------------------------|-------------------------|--------------------------|-------------------------|-------------------------|
|                                                               |                         | AA-based <sup>a</sup><br>(n = 143) | EGFRab-<br>based<br>(n = 115) | FTD/TPI<br>(n = 144)    | FTD/TPI+BEV<br>(n = 129) | REG<br>(n = 77)         | Other<br>(n = 37)       |
| <b>Number of hospital beds</b>                                |                         |                                    |                               |                         |                          |                         |                         |
| <200 beds                                                     | 23 (3.6)                | 7 (4.9)                            | 5 (4.3)                       | 4 (2.8)                 | 4 (3.1)                  | 1 (1.3)                 | 2 (5.4)                 |
| 200–499 beds                                                  | 369 (57.2)              | 81 (56.6)                          | 63 (54.8)                     | 90 (62.5)               | 67 (51.9)                | 44 (57.1)               | 24 (64.9)               |
| ≥500 beds                                                     | 253 (39.2)              | 55 (38.5)                          | 47 (40.9)                     | 50 (34.7)               | 58 (45.0)                | 32 (41.6)               | 11 (29.7)               |
| Designated cancer hospital                                    | 502 (77.8)              | 104 (72.7)                         | 98 (85.2)                     | 111 (77.1)              | 105 (81.4)               | 58 (75.3)               | 26 (70.3)               |
| <b>Demographics/disease characteristics</b>                   |                         |                                    |                               |                         |                          |                         |                         |
| Age, mean (SD) <sup>b</sup>                                   | 65.0 (10.9)             | 63.1 (11.7)                        | 64.2 (10.9)                   | 65.9 (10.3)             | 65.9 (10.2)              | 65.6 (11.9)             | 66.4 (8.5)              |
| Sex: male                                                     | 416 (64.5)              | 94 (65.7)                          | 74 (64.3)                     | 101 (70.1)              | 73 (56.6)                | 50 (64.9)               | 24 (64.9)               |
| BMI, kg/m <sup>2</sup> , mean (SD) <sup>c</sup>               | 22.4 (3.6) <sup>d</sup> | 22.4 (4.2) <sup>e</sup>            | 22.5 (3.7) <sup>f</sup>       | 22.6 (3.2) <sup>g</sup> | 21.3 (3.2) <sup>h</sup>  | 21.2 (3.6) <sup>i</sup> | 22.7 (3.2) <sup>j</sup> |
| BMI ≤18.5 kg/m <sup>2c</sup>                                  | 34 (14.6) <sup>d</sup>  | 10 (19.6) <sup>e</sup>             | 7 (14.9) <sup>f</sup>         | 4 (8.2) <sup>g</sup>    | 6 (14.0) <sup>h</sup>    | 6 (30.0) <sup>i</sup>   | 1 (4.3) <sup>j</sup>    |
| ADL – independent <sup>c</sup>                                | 193 (85.8) <sup>k</sup> | 43 (89.6) <sup>l</sup>             | 40 (88.9) <sup>m</sup>        | 41 (85.4) <sup>n</sup>  | 33 (78.6) <sup>o</sup>   | 14 (73.7) <sup>p</sup>  | 22 (95.7) <sup>q</sup>  |
| ADL – dependent <sup>c</sup>                                  | 32 (14.2) <sup>k</sup>  | 5 (10.4) <sup>l</sup>              | 5 (11.1) <sup>m</sup>         | 7 (14.6) <sup>n</sup>   | 9 (21.4) <sup>o</sup>    | 5 (26.3) <sup>p</sup>   | 1 (4.3) <sup>q</sup>    |
| Left-sided CRC <sup>c</sup>                                   | 537 (83.3)              | 117 (81.8)                         | 101 (87.8)                    | 115 (79.9)              | 111 (86.0)               | 65 (84.4)               | 28 (75.7)               |
| Right-sided CRC <sup>c</sup>                                  | 65 (10.1)               | 17 (11.9)                          | 10 (8.7)                      | 13 (9.0)                | 11 (8.5)                 | 7 (9.1)                 | 7 (18.9)                |
| <b>Antitumor therapies</b>                                    |                         |                                    |                               |                         |                          |                         |                         |
| CRC surgery before index date                                 | 287 (44.5)              | 59 (41.3)                          | 53 (46.1)                     | 58 (40.3)               | 66 (51.2)                | 30 (39.0)               | 21 (56.8)               |
| CRC conversion surgery during 1L or 2L therapy                | 72 (11.2)               | 17 (11.9)                          | 20 (17.4)                     | 15 (10.4)               | 7 (5.4)                  | 6 (7.8)                 | 7 (18.9)                |
| Liver surgery during 1L or 2L therapy                         | 47 (7.3)                | 12 (8.4)                           | 20 (17.4)                     | 4 (2.8)                 | 7 (5.4)                  | 1 (1.3)                 | 3 (8.1)                 |
| Lung surgery during 1L or 2L therapy                          | 3 (0.5)                 | 1 (0.7)                            | 1 (0.9)                       | 1 (0.7)                 | 0 (0.0)                  | 0 (0.0)                 | 0 (0.0)                 |
| Duration of therapy from 1L to start of 3L, mean, months (SD) | 18.9 (9.2)              | 17.1 (8.7)                         | 18.9 (8.9)                    | 19.3 (9.0)              | 20.9 (9.3)               | 18.6 (9.0)              | 18.0 (11.2)             |
| <b>Sites of metastasis<sup>c</sup></b>                        |                         |                                    |                               |                         |                          |                         |                         |
| Liver                                                         | 419 (65.0)              | 84 (58.7)                          | 81 (70.4)                     | 95 (66.0)               | 88 (68.2)                | 49 (63.6)               | 22 (59.5)               |
| Lung                                                          | 151 (23.4)              | 26 (18.2)                          | 24 (20.9)                     | 39 (27.1)               | 40 (31.0)                | 18 (23.4)               | 4 (10.8)                |
| Bone                                                          | 49 (7.6)                | 11 (7.7)                           | 9 (7.8)                       | 12 (8.3)                | 8 (6.2)                  | 6 (7.8)                 | 3 (8.1)                 |
| Brain                                                         | 8 (1.2)                 | 3 (2.1)                            | 1 (0.9)                       | 1 (0.7)                 | 3 (2.3)                  | 0 (0.0)                 | 0 (0.0)                 |
| <b>Comorbidities<sup>c</sup></b>                              |                         |                                    |                               |                         |                          |                         |                         |
| Hypertension                                                  | 341 (52.9)              | 69 (48.3)                          | 60 (52.2)                     | 79 (54.9)               | 77 (59.7)                | 37 (48.1)               | 19 (51.4)               |
| Diabetes                                                      | 174 (27.0)              | 37 (25.9)                          | 39 (33.9)                     | 41 (28.5)               | 30 (23.3)                | 18 (23.4)               | 9 (24.3)                |
| Liver disease                                                 | 174 (27.0)              | 34 (23.8)                          | 35 (30.4)                     | 42 (29.2)               | 37 (28.7)                | 16 (20.8)               | 10 (27.0)               |
| Renal disease                                                 | 87 (13.5)               | 18 (12.6)                          | 16 (13.9)                     | 18 (12.5)               | 18 (14.0)                | 13 (16.9)               | 4 (10.8)                |
| Dry skin/itching                                              | 519 (80.5)              | 116 (81.1)                         | 94 (81.7)                     | 112 (77.8)              | 112 (86.8)               | 59 (76.6)               | 26 (70.3)               |
| Rash/acne                                                     | 185 (28.7)              | 49 (34.3)                          | 34 (29.6)                     | 42 (29.2)               | 31 (24.0)                | 19 (24.7)               | 10 (27.0)               |
| Paronychia                                                    | 42 (6.5)                | 12 (8.4)                           | 11 (9.6)                      | 8 (5.6)                 | 8 (6.2)                  | 3 (3.9)                 | 0 (0.0)                 |
| Neuropathy                                                    | 155 (24.0)              | 39 (27.3)                          | 25 (21.7)                     | 36 (25.0)               | 33 (25.6)                | 13 (16.9)               | 9 (24.3)                |

All values are n (%) unless indicated otherwise

1L/2L/3L first-line/second-line/third-line, AA antiangiogenic, ADL activities of daily living, BEV bevacizumab, BMI body mass index, CRC colorectal cancer, EGFRab epidermal growth factor receptor antibody, FTD/TPI trifluridine/tipiracil, REG regorafenib, SD standard deviation

<sup>a</sup>Not FTD/TPI+BEV; <sup>b</sup>At start of third-line therapy; <sup>c</sup>Assessed within 60 days before starting third-line therapy; <sup>d</sup>N = 233; <sup>e</sup>N = 51; <sup>f</sup>N = 47; <sup>g</sup>N = 49; <sup>h</sup>N = 43; <sup>i</sup>N = 20; <sup>j</sup>N = 23; <sup>k</sup>N = 225; <sup>l</sup>N = 48; <sup>m</sup>N = 45; <sup>n</sup>N = 48; <sup>o</sup>N = 42; <sup>p</sup>N = 19; <sup>q</sup>N = 23; <sup>r</sup>Assessed within 60 days before the index date for first-line therapy

**Table S6** Demographics and clinical characteristics of the subgroup of patients with left-sided CRC

| Variable                                        | Start of<br>1L therapy<br>(N = 970) | Start of<br>2L therapy<br>(N = 970) | Start of 2L therapy      |                          |                              |
|-------------------------------------------------|-------------------------------------|-------------------------------------|--------------------------|--------------------------|------------------------------|
|                                                 |                                     |                                     | Bevacizumab<br>(n = 605) | Ramucirumab<br>(n = 269) | Aflibercept<br>beta (n = 96) |
| Number of hospital beds                         |                                     |                                     |                          |                          |                              |
| <200 beds                                       |                                     | 38 (3.9)                            | 26 (4.3)                 | 11 (4.1)                 | 1 (1.0)                      |
| 200–499 beds                                    |                                     | 541 (55.8)                          | 333 (55.0)               | 162 (60.2)               | 46 (47.9)                    |
| ≥500 beds                                       |                                     | 391 (40.3)                          | 246 (40.7)               | 96 (35.7)                | 49 (51.0)                    |
| Designated cancer hospital                      |                                     | 768 (79.2)                          | 468 (77.4)               | 216 (80.3)               | 84 (87.5)                    |
| Demographics/disease characteristics            |                                     |                                     |                          |                          |                              |
| Sex: male                                       |                                     | 668 (68.9)                          | 412 (68.1)               | 185 (68.8)               | 71 (74.0)                    |
| Age, years, mean (SD)                           | 63.7 (10.5)                         | 64.6 (10.5) <sup>a</sup>            | 64.6 (10.5) <sup>a</sup> | 64.5 (10.3) <sup>a</sup> | 64.3 (11.4) <sup>a</sup>     |
| BMI, kg/m <sup>2</sup> , mean (SD) <sup>b</sup> | 22.0 (3.5) <sup>c</sup>             | 21.9 (3.8) <sup>d</sup>             | 22.1 (3.9) <sup>e</sup>  | 21.7 (3.3) <sup>f</sup>  | 21.5 (3.9) <sup>g</sup>      |
| BMI ≤18.5 kg/m <sup>2b</sup>                    | 111 (13.0) <sup>c</sup>             | 82 (18.5) <sup>d</sup>              | 47 (16.4) <sup>e</sup>   | 23 (20.7) <sup>f</sup>   | 12 (26.7) <sup>g</sup>       |
| ADL – independent <sup>b</sup>                  | 781 (93.2) <sup>h</sup>             | 392 (89.7) <sup>i</sup>             | 251 (89.3) <sup>j</sup>  | 102 (92.7) <sup>k</sup>  | 39 (84.8) <sup>l</sup>       |
| ADL – dependent <sup>b</sup>                    | 57 (6.8) <sup>h</sup>               | 45 (10.3) <sup>i</sup>              | 30 (10.7) <sup>j</sup>   | 8 (7.3) <sup>k</sup>     | 7 (15.2) <sup>l</sup>        |
| Antitumor therapies                             |                                     |                                     |                          |                          |                              |
| CRC surgery before index date                   | 407 (42.0)                          | -                                   | 240 (39.7)               | 124 (46.1)               | 43 (44.8)                    |
| CRC conversion surgery during 1L therapy        | -                                   | 101 (10.4)                          | 65 (10.7)                | 24 (8.9)                 | 12 (12.5)                    |
| Liver surgery during 1L therapy                 | -                                   | 62 (6.4)                            | 32 (5.3)                 | 23 (8.6)                 | 7 (7.3)                      |
| Lung surgery during 1L therapy                  | -                                   | 4 (0.4)                             | 2 (0.3)                  | 2 (0.7)                  | 0 (0)                        |
| Duration of 1L therapy, mean, months (SD)       | -                                   | 9.81 (6.86)                         | 9.75 (6.89)              | 9.92 (7.03)              | 9.93 (6.29)                  |
| Sites of metastasis <sup>b</sup>                |                                     |                                     |                          |                          |                              |
| Liver                                           | 605 (62.4)                          | 623 (64.2)                          | 392 (64.8)               | 166 (91.7)               | 65 (67.7)                    |
| Lung                                            | 172 (17.7)                          | 209 (21.5)                          | 128 (21.2)               | 64 (23.8)                | 17 (17.7)                    |
| Bone                                            | 41 (4.2)                            | 64 (6.6)                            | 40 (6.6)                 | 19 (7.1)                 | 5 (5.2)                      |
| Brain                                           | 6 (0.6)                             | 7 (0.7)                             | 6 (1.0)                  | 0 (0)                    | 1 (1.0)                      |
| Comorbidities <sup>b</sup>                      |                                     |                                     |                          |                          |                              |
| Hypertension                                    | 297 (30.6)                          | 361 (37.2)                          | 219 (36.2)               | 99 (36.8)                | 43 (44.8)                    |
| Diabetes                                        | 240 (24.7)                          | 259 (26.7)                          | 154 (24.5)               | 77 (28.6)                | 28 (29.2)                    |
| Liver disease                                   | 174 (17.9)                          | 241 (24.8)                          | 142 (23.5)               | 72 (26.8)                | 27 (28.1)                    |
| Renal disease                                   | 87 (9.0)                            | 91 (9.4)                            | 47 (7.8)                 | 33 (12.3)                | 11 (11.5)                    |
| Dry skin/itching                                | 265 (27.3)                          | 775 (79.9)                          | 483 (79.8)               | 211 (78.4)               | 81 (84.4)                    |
| Rash/acne                                       | 69 (7.1)                            | 318 (32.8)                          | 203 (33.6)               | 90 (33.5)                | 25 (26.0)                    |
| Paronychia                                      | 3 (0.3)                             | 78 (8.0)                            | 47 (7.8)                 | 26 (9.7)                 | 5 (5.2)                      |
| Neuropathy                                      | 48 (4.9)                            | 189 (19.5)                          | 115 (19.0)               | 50 (18.6)                | 24 (25.0)                    |

All values are n (%) unless indicated otherwise

1L/2L first-line/second-line, ADL activities of daily living, BMI body mass index, CRC colorectal cancer, SD standard deviation

<sup>a</sup>Assessed at the start of second-line therapy; <sup>b</sup>Assessed within 60 days before the index date for first-line therapy and within 60 days before starting second-line therapy for second-line therapy; <sup>c</sup>N = 851; <sup>d</sup>N = 443; <sup>e</sup>N = 287; <sup>f</sup>N = 111; <sup>g</sup>N = 45; <sup>h</sup>N = 838; <sup>i</sup>N = 437; <sup>j</sup>N = 281; <sup>k</sup>N = 110; <sup>l</sup>N = 46

**Table S7** Cox regression analysis of the factors associated with treatment duration from the start of 2L irinotecan-based chemotherapy plus any antiangiogenic drug in the subgroup of patients with left-sided CRC ( $n = 970$ )

| Covariate                                                        | HR   | 95% CI     | p-value |
|------------------------------------------------------------------|------|------------|---------|
| Demographics and disease characteristics                         |      |            |         |
| ≥70 years at start of 2L therapy <sup>a</sup>                    | 1.12 | 0.94, 1.35 | 0.20    |
| Sex: male                                                        | 1.09 | 0.91, 1.31 | 0.36    |
| Metastases/comorbidities before starting 2L therapy <sup>b</sup> |      |            |         |
| Liver metastases                                                 | 1.10 | 0.92, 1.32 | 0.28    |
| Lung metastases                                                  | 0.96 | 0.78, 1.18 | 0.68    |
| Diabetes                                                         | 1.04 | 0.86, 1.26 | 0.69    |
| Renal disease                                                    | 1.18 | 0.89, 1.58 | 0.25    |
| Liver disease                                                    | 0.98 | 0.81, 1.19 | 0.84    |
| Supportive medications before starting 2L therapy <sup>b</sup>   |      |            |         |
| NSAIDs <sup>a</sup>                                              | 1.28 | 1.06, 1.54 | 0.01    |
| Antihypertensives <sup>a</sup>                                   | 1.17 | 0.97, 1.43 | 0.10    |
| Prior antitumor therapies                                        |      |            |         |
| CRC surgery before index date                                    | 0.60 | 0.50, 0.72 | <0.001  |
| CRC conversion surgery during 1L therapy                         | 0.96 | 0.72, 1.27 | 0.76    |
| Liver surgery during 1L therapy                                  | 0.63 | 0.42, 0.93 | 0.02    |
| Duration of 1L therapy ≥6 months <sup>a</sup>                    | 0.80 | 0.67, 0.95 | 0.01    |

1L/2L first-line/second-line, CI confidence interval, CRC colorectal cancer, HR hazard ratio, NSAID nonsteroidal anti-inflammatory drug

<sup>a</sup>Within 60 days before starting 2L therapy, 35.9% (348/970) of patients were ≥70 years of age, 26.3% (255/970) of patients were prescribed NSAIDs, 28.9% (280/970) were prescribed antihypertensives, and 68.1% (661/970) had duration of 1L therapy ≥6 months

<sup>b</sup>Within 60 days before starting 2L therapy



**Fig. S1** Treatment sequences and median duration for 1L FOLFOX plus anti-EGFR antibody therapy, 2L irinotecan-based chemotherapy plus any antiangiogenic drug, and 3L therapy with any treatment regimen. 1L/2L/3L first-line/second-line/third-line, AA antiangiogenic, AFL aflibercept beta, BEV bevacizumab, CAPIRI irinotecan + capecitabine, CET cetuximab, CI confidence interval, EGFRab epidermal growth factor receptor monoclonal antibody, FOLFIRI leucovorin + 5-fluorouracil + irinotecan, FOLFOX leucovorin + 5-fluorouracil + oxaliplatin, FTD/TPI trifluridine/tipiracil, IRI irinotecan, IRIS irinotecan + tegafur + gimeracil + oteracil potassium, PANI panitumumab, RAM ramucirumab, REG regorafenib

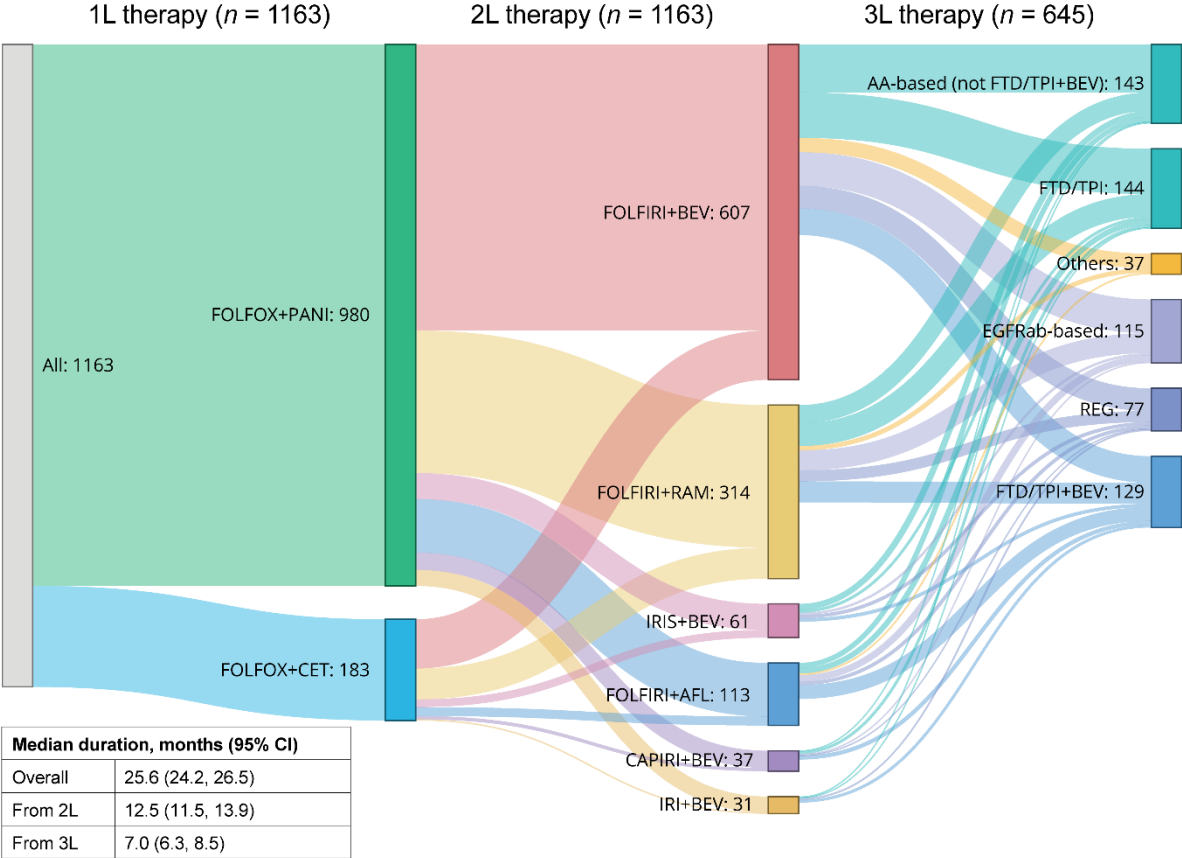

**Fig. S2** Median overall treatment duration by CRC sidedness (a) and CRC surgery before starting 1L therapy (b). 1L first-line, CI confidence interval, CRC colorectal cancer

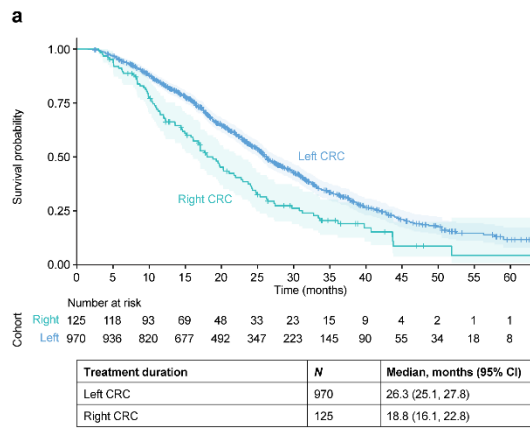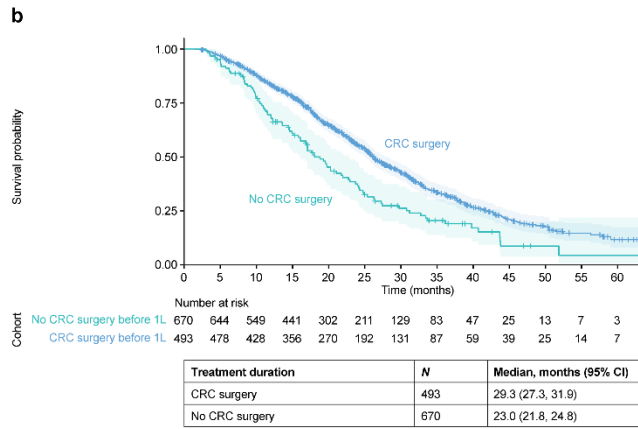

**Fig. S3** Treatment sequences and median duration for 1L FOLFOX plus anti-EGFR antibody therapy, 2L irinotecan-based chemotherapy plus any antiangiogenic drug, and 3L therapy with any treatment regimen for the subgroup of patients with left-sided CRC.

1L/2L/3L first-line/second-line/third-line, AA antiangiogenic, AFL aflibercept beta, BEV bevacizumab, CAPIRI irinotecan + capecitabine, CET cetuximab, CI confidence interval, CRC, colorectal cancer, EGFRab epidermal growth factor receptor monoclonal antibody, FOLFIRI leucovorin + 5-fluorouracil + irinotecan, FOLFOX leucovorin + 5-fluorouracil + oxaliplatin, FTD/TPI trifluridine/tipiracil, IRI irinotecan, IRIS irinotecan + tegafur + gimeracil + oteracil potassium, PANI panitumumab, RAM ramucirumab, REG regorafenib

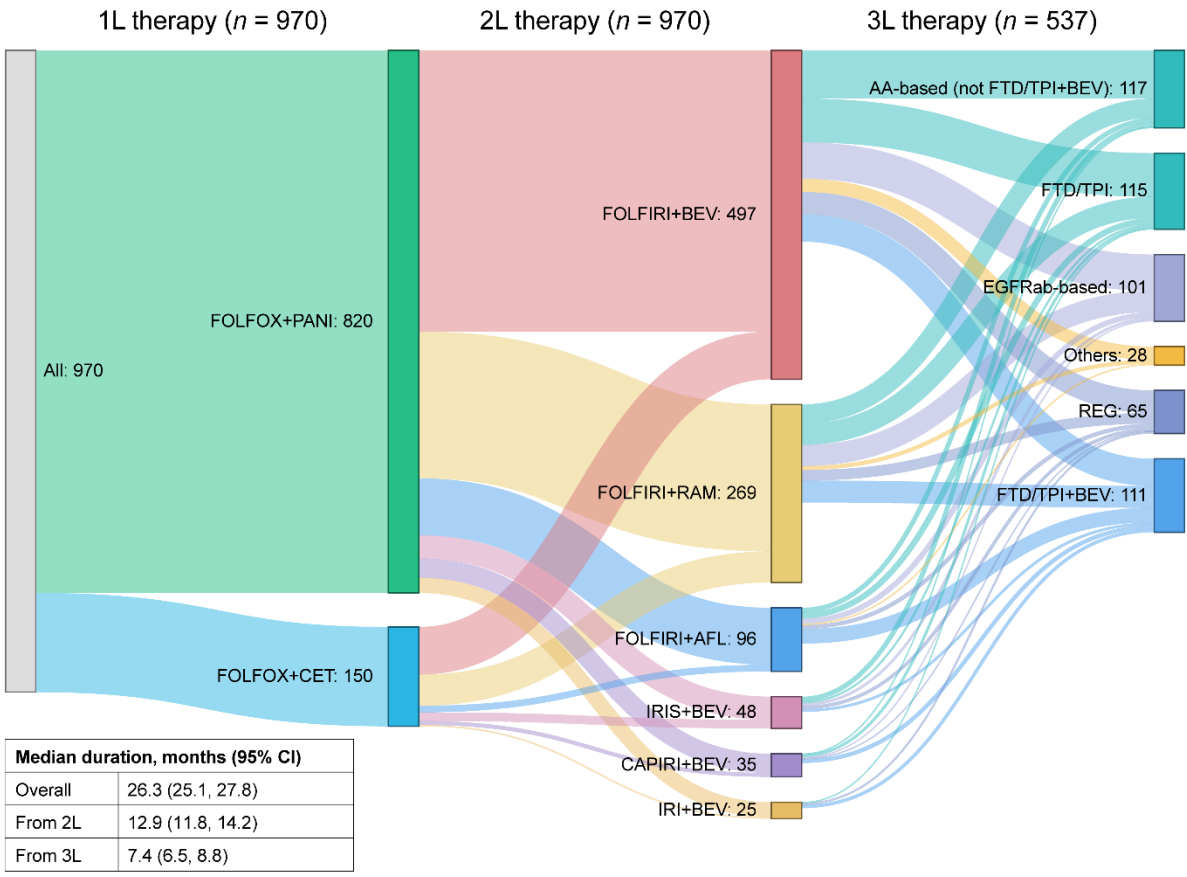

**Fig. S4** Treatment duration from the start of 2L irinotecan-based chemotherapy plus any antiangiogenic drug for the subgroup of patients with left-sided CRC (a) and from the start of 3L therapy (b) for the subgroup of patients with left-sided CRC by treatment regimens. 2L/3L second-line/third-line, AA antiangiogenic, AFL aflibercept beta, BEV bevacizumab, CI confidence interval, EGFRab epidermal growth factor receptor monoclonal antibody, FTD/TPI trifluridine/tipiracil, RAM ramucirumab, REG regorafenib

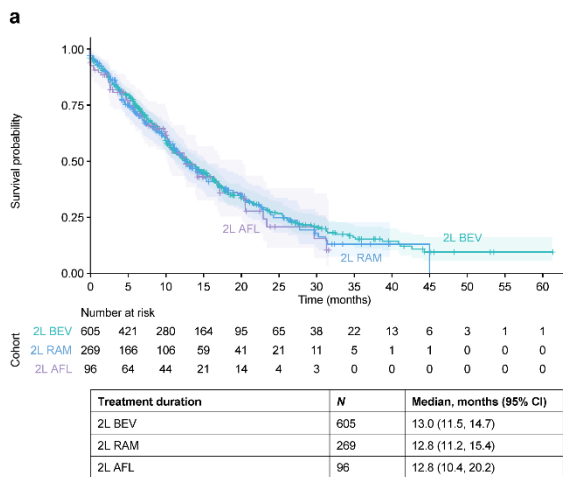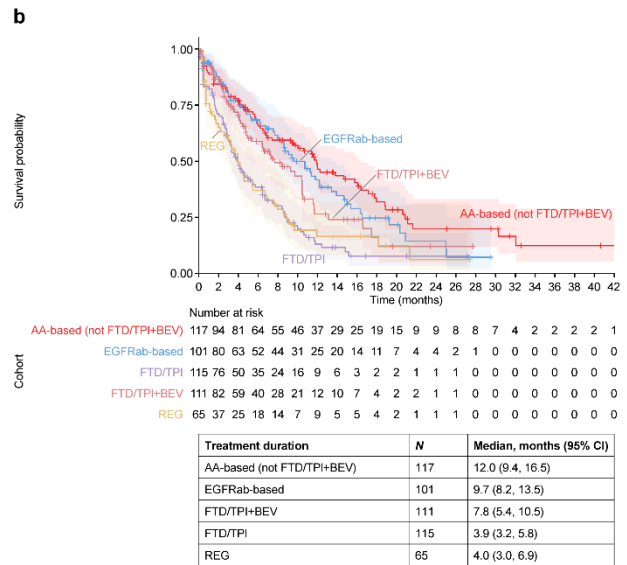

Supplement: 12325_2022_2122_MOESM1_ESM.pdf [file 12325_2022_2122_MOESM1_ESM.pdf]
